# Supplementary material for: Smoking Cessation and Changes in Anxiety and Depression in Adults With and Without Psychiatric Disorders
Source: PubMed Central journal article supplement (PMC10233414; doi:10.1001/jamanetworkopen.2023.16111), 2023-05-31
Supplement: jamanetwopen-e2316111-s002.pdf [file jamanetwopen-e2316111-s002.pdf]

## Data Sharing Statement

Wu. Smoking Cessation and Changes in Anxiety and Depression in Adults With and Without Psychiatric Disorders. *JAMA Netw Open*. Published May 31, 2023.

doi:10.1001/jamanetworkopen.2023.16111

### Data

**Data available:** No

### Additional Information

**Explanation for why data not available:** We do not own any of the data analysed in this study, all data was accessed through a data sharing platform called Vivli
